# Supplementary material
Source: ML conference proceedings conference paper supplement (https://openreview.net/forum?id=HYGnmSLBCf)
Supplement: supplementary_material [file attachment]

## 457 A Additional theoretical results

**Definition A.1.** Consider model  $A$  with input space  $X \subseteq \mathbb{R}^{nd}$ , previously observed data  $x \sim X$ , and  $k$  class centroids  $c \in \mathbb{R}^{kd}$  learned by  $A$ . We define **domain shift** as an update to the class centroids  $c \rightarrow c^* \in \mathbb{R}^{kd}$ . **Domain shift sensitivity** is then the proportion of triplets flipped as a result of this update.

$$\sigma_A(c, c^*) := E\left[\frac{\|S_A(x; c) - S_A(x; c^*)\|_1}{|S_A(x; c)|}\right]$$

458 From this definition and Theorem 3.9, it immediately follows that sensitivity to domain shift should  
459 have the same U-shaped relationship with alignment that few-shot learning does in cases where the  
460 teacher model is robust to domain shift.

461 **Corollary A.2. (Alignment and domain-shift robustness).** Consider input space  $X \subseteq \mathbb{R}^{nd}$ , shared  
462 data  $x \sim X$ , and three models,  $A$ ,  $B_1$ , and  $B_2$  with  $D_P(A, B_1; X) = \epsilon_{B_1}$  and  $D_P(A, B_2; X) = \epsilon_{B_2}$ .  
463 Let  $c \in \mathbb{R}^{kd}$  be  $k$  class centroids learned by  $A$ ,  $B_1$  and  $B_2$ . If  $\sigma_A(c, c^*) = 0$  and  $|0.5 - \epsilon_{B_1}| <$   
464  $|0.5 - \epsilon_{B_2}|$ , then  $\sigma_{B_1}(c, c^*) < \sigma_{B_2}(c, c^*)$ .

465 We can also use this framework to define robustness to adversarial examples. We assume that an  
466 adversarial example is an object that maximizes perceptual (i.e. representational) disagreement  
467 between the teacher and the student.

468 **Definition A.3.** Consider input space  $X \subseteq \mathbb{R}^{nd}$ , shared data  $x \sim X$ , and two models,  $A$  and  $B$ , with  
469  $D_P(A, B; X) = \epsilon_B$ . An **adversarial example** is an object  $e \in \mathbb{R}^d$  that maximizes disagreement  
470 between  $A$  and  $B$  on  $S(x; e)$ , the subset of  $n(n-1)/2$  triplets relating the objects in  $x$  to  $e$ .

$$e = \max_X \|S_A(x; e) - S_B(x; e)\|_1 \quad (1)$$

471 Using Definition 3.6 we immediately get the following result.

472 **Lemma A.4.** Consider an input space  $X \subseteq \mathbb{R}_{nd}$ , and two agents,  $A$  and  $B$ .  $D_P(A, B; X) =$   
473  $E\left[\frac{\|S_A(X) - S_B(X)\|_1}{n(n-1)(n-2)/2}\right]$ .

474 We can now show that a model that is more aligned with the teacher will, on average, also be more  
475 robust to adversarial examples.

476 **Theorem A.5. (Alignment and adversarial robustness).** Consider input space  $X \subseteq \mathbb{R}^{nd}$ , shared  
477 data  $x \sim X$ , and three models,  $A$ ,  $B_1$ , and  $B_2$  with  $D_P(A, B_1; X) = \epsilon_{B_1}$  and  $D_P(A, B_2; X) = \epsilon_{B_2}$ .  
478 If  $\epsilon_{B_1} < \epsilon_{B_2}$ , then  $E[\max_{e \in X} \|S_A(x; e) - S_{B_1}(x; e)\|_1] < E[\max_{e \in X} \|S_A(x; e) - S_{B_2}(x; e)\|_1]$ .

479 *Proof.* Note that for a set of  $k$  binomial random variables  $X_i \sim \text{Bin}(n, p)$ , the expectation of the  
480  $k$ -th order statistic is  $E[X_{(k)}] = \sum_{x=0}^n (1 - F(x; n, p))^k$  where  $F(x; n, p) = P(X_i \leq x)$ . In the  
481 case of adversarial examples, let  $X_i$  be a random variable corresponding to the set of objects sampled  
482 uniformly from the input space  $X \subseteq \mathbb{R}^{nd}$  then  $U = \|S_A(X; e) - S_{B_1}(X; e)\|_1, Y \sim \text{Bin}(n(n-1)/2, \epsilon_{B_1})$   
483 and similarly  $V = \|S_A(X; e) - S_{B_2}(X; e)\|_1, V \sim \text{Bin}(n(n-1)/2, \epsilon_{B_2})$ . In that case,  
484 the expected disagreement of  $A$  and  $B_1$  on an adversarial example is  $E[U_{(n)}] = \sum_{x=0}^{n(n-1)/2} (1 -$   
485  $F(x; n(n-1)/2, \epsilon_{B_1}))^n$  and for  $A$  and  $B_2$  it is  $E[V_{(n)}] = \sum_{x=0}^{n(n-1)/2} (1 - F(x; n(n-1)/2, \epsilon_{B_2}))^n$ .  
486 If  $\epsilon_{B_1} < \epsilon_{B_2}$ , then  $F(x; n(n-1)/2, \epsilon_{B_1}) > F(x; n(n-1)/2, \epsilon_{B_2})$  and thus  $E[U_{(n)}] < E[V_{(n)}]$ .  $\square$

487 **Remark A.6.** While this theorem shows that increased alignment generally leads to increased  
488 adversarial robustness, this relies on a representational metric of adversarial examples. However, in  
489 practice, adversarial robustness is often measured using hard classification error as a simple proxy.  
490 This proxy does not capture the fine-grained degree of misalignment between humans and a model  
491 on each example. As a result, when measuring adversarial robustness using this proxy, the effect of  
492 alignment may be dampened by the U-shaped effect seen in other classification settings as mentioned  
493 above.

## 494 B List of 491 models used in experiments

495 adv\_inception\_v3, bat\_resnext26ts, beit\_base\_patch16\_224, beit\_base\_patch16\_384,  
496 beit\_large\_patch16\_224, beit\_large\_patch16\_384, botnet26t\_256, cait\_s24\_224, cait\_s24\_384,

497 cait\_s36\_384, cait\_xs24\_384, cait\_xxs24\_224, cait\_xxs24\_384, cait\_xxs36\_224, cait\_xxs36\_384,  
 498 coat\_lite\_mini, coat\_lite\_small, coat\_lite\_tiny, coat\_mini, coat\_tiny, convit\_base, convit\_small,  
 499 convit\_tiny, convmixer\_1024\_20\_ks9\_p14, convmixer\_1536\_20, convmixer\_768\_32, con-  
 500 vnext\_base, convnext\_base\_384\_in22ft1k, convnext\_base\_in22ft1k, convnext\_large, con-  
 501 vnext\_large\_384\_in22ft1k, convnext\_large\_in22ft1k, convnext\_small, convnext\_tiny, csp-  
 502 darknet53, cspresnet50, cspresnext50, deit\_base\_patch16\_224, deit\_base\_patch16\_384,  
 503 deit\_small\_patch16\_224, deit\_tiny\_patch16\_224, densenet121, densenet161, densenet169,  
 504 densenet201, densenetblur121d, dla102, dla102x, dla102x2, dla169, dla34, dla46\_c, dla46x\_c, dla60,  
 505 dla60\_res2net, dla60\_res2next, dla60x, dla60x\_c, dm\_nfnet\_f0, dm\_nfnet\_f1, dm\_nfnet\_f2, dpn107,  
 506 dpn131, dpn68, dpn68b, dpn92, dpn98, eca\_botnext26ts\_256, eca\_halonext26ts, eca\_nfnet\_l0,  
 507 eca\_nfnet\_l1, eca\_nfnet\_l2, eca\_resnet33ts, eca\_resnext26ts, ecaresnet101d, ecaresnet101d\_pruned,  
 508 ecaresnet269d, ecaresnet26t, ecaresnet50d, ecaresnet50d\_pruned, ecaresnet50t, ecaresnetlight,  
 509 efficientnet\_b0, efficientnet\_b1, efficientnet\_b1\_pruned, efficientnet\_b2, efficientnet\_b2\_pruned,  
 510 efficientnet\_b3, efficientnet\_b3\_pruned, efficientnet\_b4, efficientnet\_el, efficientnet\_el\_pruned,  
 511 efficientnet\_em, efficientnet\_es, efficientnet\_es\_pruned, efficientnet\_lite0, efficientnetv2\_rw\_m,  
 512 efficientnetv2\_rw\_s, efficientnetv2\_rw\_t, ens\_adv\_inception\_resnet\_v2, ese\_vovnet19b\_dw,  
 513 ese\_vovnet39b, fbnetc\_100, fbnetv3\_b, fbnetv3\_d, fbnetv3\_g, gc\_efficientnetv2\_rw\_t, gres-  
 514 net33ts, gresnet50t, gresnext26ts, gresnext50ts, gernet\_l, gernet\_m, gernet\_s, ghostnet\_100,  
 515 gluon\_inception\_v3, gluon\_resnet101\_v1b, gluon\_resnet101\_v1c, gluon\_resnet101\_v1d,  
 516 gluon\_resnet101\_v1s, gluon\_resnet152\_v1b, gluon\_resnet152\_v1c, gluon\_resnet152\_v1d,  
 517 gluon\_resnet152\_v1s, gluon\_resnet18\_v1b, gluon\_resnet34\_v1b, gluon\_resnet50\_v1b,  
 518 gluon\_resnet50\_v1c, gluon\_resnet50\_v1d, gluon\_resnet50\_v1s, gluon\_resnext101\_32x4d,  
 519 gluon\_resnext101\_64x4d, gluon\_resnext50\_32x4d, gluon\_senet154, gluon\_seresnext101\_32x4d,  
 520 gluon\_seresnext101\_64x4d, gluon\_seresnext50\_32x4d, gluon\_xception65, gmixer\_24\_224,  
 521 gmlp\_s16\_224, halo2botnet50ts\_256, halonet26t, halonet50ts, haloregnetz\_b, hardcorenas\_a,  
 522 hardcorenas\_b, hardcorenas\_c, hardcorenas\_d, hardcorenas\_e, hardcorenas\_f, hrnet\_w18,  
 523 hrnet\_w18\_small, hrnet\_w18\_small\_v2, hrnet\_w30, hrnet\_w32, hrnet\_w40, hrnet\_w44, hr-  
 524 net\_w48, hrnet\_w64, ig\_resnext101\_32x16d, ig\_resnext101\_32x8d, inception\_resnet\_v2,  
 525 inception\_v3, inception\_v4, jx\_nest\_base, jx\_nest\_small, jx\_nest\_tiny, lambda\_resnet26rpt\_256,  
 526 lambda\_resnet26t, lambda\_resnet50ts, lamhalobotnet50ts\_256, lcnet\_050, lcnet\_075, lc-  
 527 net\_100, legacy\_senet154, legacy\_seresnet101, legacy\_seresnet152, legacy\_seresnet18,  
 528 legacy\_seresnet34, legacy\_seresnet50, legacy\_seresnext101\_32x4d, legacy\_seresnext26\_32x4d,  
 529 legacy\_seresnext50\_32x4d, mixer\_b16\_224, mixer\_b16\_224\_miil, mixnet\_l, mixnet\_m,  
 530 mixnet\_s, mixnet\_xl, mnasnet\_100, mnasnet\_small, mobilenetv2\_050, mobilenetv2\_100,  
 531 mobilenetv2\_110d, mobilenetv2\_120d, mobilenetv2\_140, mobilenetv3\_large\_100, mo-  
 532 bilenetv3\_large\_100\_miil, mobilenetv3\_rw, nasnetalarge, nf\_regnet\_b1, nf\_resnet50, nfnet\_l0,  
 533 pit\_b\_224, pit\_s\_224, pit\_ti\_224, pit\_xs\_224, pnasnet5large, regnetx\_002, regnetx\_004, reg-  
 534 netx\_006, regnetx\_008, regnetx\_016, regnetx\_032, regnetx\_040, regnetx\_064, regnetx\_080,  
 535 regnetx\_120, regnetx\_160, regnetx\_320, regnety\_002, regnety\_004, regnety\_006, regnety\_008,  
 536 regnety\_016, regnety\_032, regnety\_040, regnety\_064, regnety\_080, regnety\_120, regnety\_160,  
 537 regnety\_320, regnetz\_b16, regnetz\_c16, regnetz\_d32, regnetz\_d8, regnetz\_e8, repvgg\_a2,  
 538 repvgg\_b0, repvgg\_b1, repvgg\_b1g4, repvgg\_b2, repvgg\_b2g4, repvgg\_b3, repvgg\_b3g4,  
 539 res2net101\_26w\_4s, res2net50\_14w\_8s, res2net50\_26w\_4s, res2net50\_26w\_6s, res2net50\_26w\_8s,  
 540 res2net50\_48w\_2s, res2next50, resmlp\_12\_224, resmlp\_12\_distilled\_224, resmlp\_24\_224,  
 541 resmlp\_24\_distilled\_224, resmlp\_36\_224, resmlp\_36\_distilled\_224, resmlp\_big\_24\_224,  
 542 resmlp\_big\_24\_224\_in22ft1k, resmlp\_big\_24\_distilled\_224, resnest101e, resnest14d,  
 543 resnest200e, resnest269e, resnest26d, resnest50d, resnest50d\_1s4x24d, resnest50d\_4s2x40d,  
 544 resnet101, resnet101d, resnet152, resnet152d, resnet18, resnet18d, resnet200d, resnet26,  
 545 resnet26d, resnet26t, resnet32ts, resnet33ts, resnet34, resnet34d, resnet50, resnet50\_gn,  
 546 resnet50d, resnet51q, resnet61q, resnetblur50, resnetrs101, resnetrs152, resnetrs200,  
 547 resnetrs270, resnetrs350, resnetrs420, resnetrs50, resnetv2\_101, resnetv2\_101x1\_bitm,  
 548 resnetv2\_50, resnetv2\_50x1\_bit\_distilled, resnetv2\_50x1\_bitm, resnext101\_32x8d, resnext26ts,  
 549 resnext50\_32x4d, resnext50d\_32x4d, rexnet\_100, rexnet\_130, rexnet\_150, rexnet\_200, se-  
 550 botnet33ts\_256, sehalonet33ts, selecsls42b, selecsls60, selecsls60b, semnasnet\_075, semnas-  
 551 net\_100, seresnet152d, seresnet33ts, seresnet50, seresnext26d\_32x4d, seresnext26t\_32x4d,  
 552 seresnext26ts, seresnext50\_32x4d, skresnet18, skresnet34, skresnext50\_32x4d, spnasnet\_100,  
 553 ssl\_resnet18, ssl\_resnet50, ssl\_resnext101\_32x16d, ssl\_resnext101\_32x4d, ssl\_resnext101\_32x8d,  
 554 ssl\_resnext50\_32x4d, swin\_base\_patch4\_window12\_384, swin\_base\_patch4\_window7\_224,  
 555 swin\_large\_patch4\_window12\_384, swin\_large\_patch4\_window7\_224,

556 swin\_small\_patch4\_window7\_224, swin\_tiny\_patch4\_window7\_224, swsl\_resnet18,  
 557 swsl\_resnet50, swsl\_resnext101\_32x16d, swsl\_resnext101\_32x4d, swsl\_resnext101\_32x8d,  
 558 swsl\_resnext50\_32x4d, tf\_efficientnet\_b0, tf\_efficientnet\_b0\_ap, tf\_efficientnet\_b0\_ns,  
 559 tf\_efficientnet\_b1, tf\_efficientnet\_b1\_ap, tf\_efficientnet\_b1\_ns, tf\_efficientnet\_b2,  
 560 tf\_efficientnet\_b2\_ap, tf\_efficientnet\_b2\_ns, tf\_efficientnet\_b3, tf\_efficientnet\_b3\_ap,  
 561 tf\_efficientnet\_b3\_ns, tf\_efficientnet\_b4, tf\_efficientnet\_b4\_ap, tf\_efficientnet\_b4\_ns,  
 562 tf\_efficientnet\_b5, tf\_efficientnet\_b5\_ap, tf\_efficientnet\_b5\_ns, tf\_efficientnet\_b6,  
 563 tf\_efficientnet\_b6\_ap, tf\_efficientnet\_b6\_ns, tf\_efficientnet\_b7, tf\_efficientnet\_b7\_ap,  
 564 tf\_efficientnet\_b7\_ns, tf\_efficientnet\_cc\_b0\_4e, tf\_efficientnet\_cc\_b0\_8e, tf\_efficientnet\_cc\_b1\_8e,  
 565 tf\_efficientnet\_el, tf\_efficientnet\_em, tf\_efficientnet\_es, tf\_efficientnet\_lite0, tf\_efficientnet\_lite1,  
 566 tf\_efficientnet\_lite2, tf\_efficientnet\_lite3, tf\_efficientnet\_lite4, tf\_efficientnetv2\_b0,  
 567 tf\_efficientnetv2\_b1, tf\_efficientnetv2\_b2, tf\_efficientnetv2\_b3, tf\_efficientnetv2\_l,  
 568 tf\_efficientnetv2\_l\_in21ft1k, tf\_efficientnetv2\_m, tf\_efficientnetv2\_m\_in21ft1k, tf\_efficientnetv2\_s,  
 569 tf\_efficientnetv2\_s\_in21ft1k, tf\_inception\_v3, tf\_mixnet\_l, tf\_mixnet\_m, tf\_mixnet\_s,  
 570 tf\_mobilenetv3\_large\_075, tf\_mobilenetv3\_large\_100, tf\_mobilenetv3\_large\_minimal\_100,  
 571 tf\_mobilenetv3\_small\_075, tf\_mobilenetv3\_small\_100, tf\_mobilenetv3\_small\_minimal\_100,  
 572 tinynet\_a, tinynet\_b, tinynet\_c, tinynet\_d, tinynet\_e, tnt\_s\_patch16\_224, tv\_densenet121,  
 573 tv\_resnet101, tv\_resnet152, tv\_resnet34, tv\_resnet50, tv\_resnext50\_32x4d, twins\_pcpvt\_base,  
 574 twins\_pcpvt\_large, twins\_pcpvt\_small, twins\_svt\_base, twins\_svt\_large, twins\_svt\_small,  
 575 vgg11, vgg11\_bn, vgg13, vgg13\_bn, vgg16, vgg16\_bn, vgg19, vgg19\_bn, vis-  
 576 former\_small, vit\_base\_patch16\_224, vit\_base\_patch16\_224\_miil, vit\_base\_patch16\_384,  
 577 vit\_base\_patch32\_224, vit\_base\_patch32\_384, vit\_base\_patch8\_224, vit\_base\_r50\_s16\_384,  
 578 vit\_small\_patch16\_224, vit\_small\_patch16\_384, vit\_small\_patch32\_224, vit\_small\_patch32\_384,  
 579 vit\_small\_r26\_s32\_224, vit\_small\_r26\_s32\_384, vit\_tiny\_patch16\_224, vit\_tiny\_patch16\_384,  
 580 vit\_tiny\_r\_s16\_p8\_224, vit\_tiny\_r\_s16\_p8\_384, wide\_resnet101\_2, wide\_resnet50\_2, xception,  
 581 xception41, xception65, xception71, xcit\_large\_24\_p16\_224, xcit\_large\_24\_p16\_224\_dist,  
 582 xcit\_large\_24\_p16\_384\_dist, xcit\_large\_24\_p8\_224, xcit\_large\_24\_p8\_224\_dist,  
 583 xcit\_large\_24\_p8\_384\_dist, xcit\_medium\_24\_p16\_224, xcit\_medium\_24\_p16\_224\_dist,  
 584 xcit\_medium\_24\_p16\_384\_dist, xcit\_medium\_24\_p8\_224, xcit\_medium\_24\_p8\_224\_dist,  
 585 xcit\_nano\_12\_p16\_224, xcit\_nano\_12\_p16\_224\_dist, xcit\_nano\_12\_p16\_384\_dist,  
 586 xcit\_nano\_12\_p8\_224, xcit\_nano\_12\_p8\_224\_dist, xcit\_nano\_12\_p8\_384\_dist,  
 587 xcit\_small\_12\_p16\_224, xcit\_small\_12\_p16\_224\_dist, xcit\_small\_12\_p16\_384\_dist,  
 588 xcit\_small\_12\_p8\_224, xcit\_small\_12\_p8\_224\_dist, xcit\_small\_12\_p8\_384\_dist,  
 589 xcit\_small\_24\_p16\_224, xcit\_small\_24\_p16\_224\_dist, xcit\_small\_24\_p16\_384\_dist,  
 590 xcit\_small\_24\_p8\_224, xcit\_small\_24\_p8\_224\_dist, xcit\_small\_24\_p8\_384\_dist,  
 591 xcit\_tiny\_12\_p16\_224, xcit\_tiny\_12\_p16\_224\_dist, xcit\_tiny\_12\_p16\_384\_dist,  
 592 xcit\_tiny\_12\_p8\_224, xcit\_tiny\_12\_p8\_224\_dist, xcit\_tiny\_12\_p8\_384\_dist, xcit\_tiny\_24\_p16\_224,  
 593 xcit\_tiny\_24\_p16\_224\_dist, xcit\_tiny\_24\_p16\_384\_dist, xcit\_tiny\_24\_p8\_224,  
 594 xcit\_tiny\_24\_p8\_224\_dist, xcit\_tiny\_24\_p8\_384\_dist

## 595 C Reproducibility: Code and results data

596 All code and full results data are provided as part of the supplemental information. We will share  
 597 them publicly after the anonymity period is over. All experiments were conducted on an AWS  
 598 “x1.16xlarge” instance (no GPUs).
